# Supplementary material
Source: Springer Nature journal article supplement (https://www.springermedizin.de/resource/supplementary/12985_2014_2370_MOESM1_ESM.pdf/9606926)
Supplement: MOESM1 [file 9606926]

A

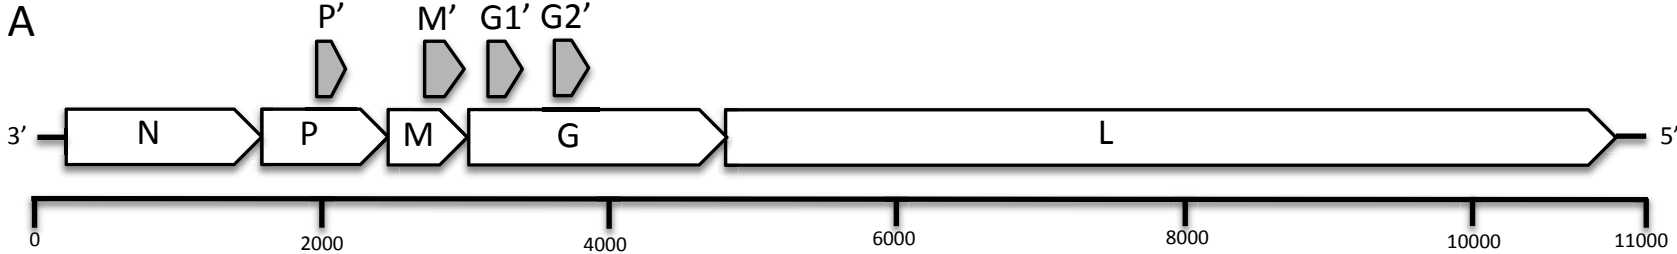

B

| Coding region | ORFs      | length (nt)  | transcription initiation sequence             | polyadenylation signal |
|---------------|-----------|--------------|-----------------------------------------------|------------------------|
| 1             | N         | 1413         | UUGUUUCGAUUAGUU <b>UAC</b>                    | GAACUUUUUUU            |
| 2             | P/P'      | 831/246      | UUGUUUUGAUU <b>AUUUAC</b>                     | GAACUUUUUUU            |
| 3             | M/M'      | 618/297      | UUGUUUAAAUU <b>AUUCUAC</b>                    | GAACUUUUUUU            |
| 4             | G/G1'/G2' | 1521/321/318 | UUGUUGAGAUUAUCAACAAACUUAUUUU <b>UGCUUCUAC</b> | GAACUUUUUUU            |
| 5             | L         | 6396         | UUGUUGGUACUAGUU <b>AGUAC</b>                  | GAACUUUUUUU            |
